# Supplementary material for: Sex-Specific Response of the Brain Free Oxylipin Profile to Soluble Epoxide Hydrolase Inhibition
Source: MDPI journal article supplement (doi:10.3390/nu15051214), 2023-02-28
Supplement: s1 [file s1]

## Supplementary Materials

**Table S1.** List of measured oxylipins and internal standards with abbreviations.

| Compound name                          | Abbreviation  |
|----------------------------------------|---------------|
| 10(11)-epoxy-docosapentaenoic acid     | 10(11)-EpDPE  |
| 11(12)-epoxy-eicosatetraenoic acid     | 11(12)-EpETE  |
| 11(12)-epoxy-eicosatrienoic acid       | 11(12)-EpETrE |
| 11,12-dihydroxy-eicosatetraenoic acid  | 11,12-DiHETE  |
| 11,12-dihydroxy-eicosatrienoic acid    | 11,12-DiHETrE |
| 11-hydroxy-eicosatetraenoic acid       | 11-HETE       |
| 12(13)-epoxy-octadecamonoenoic acid    | 12(13)EpOME   |
| 12,13-dihydroxy-octadecamonoenoic acid | 12,13-DiHOME  |
| 12-hydroxy-eicosapentaenoic acid       | 12-HEPE       |
| 12-hydroxy-eicosatetraenoic acid       | 12-HETE       |
| 12-oxo-eicosatetraenoic acid           | 12-oxo-ETE    |
| 13(14)-epoxy-docosapentaenoic acid     | 13(14)-EpDPE  |
| 13-hydroxy-octadecadienoic acid        | 13-HODE       |
| 13-hydroxy-octadecatrienoic acid       | 13-HOTrE      |
| 13-oxo-octadecadienoic acid            | 13-oxo-ODE    |
| 14(15)-epoxy-eicosatetraenoic acid     | 14(15)-EpETE  |
| 14(15)-epoxy-eicosatrienoic acid       | 14(15)-EpETrE |
| 14,15-dihydroxy-eicosatetraenoic acid  | 14,15-DiHETE  |
| 14,15-dihydroxy-eicosatrienoic acid    | 14,15-DiHETrE |
| 15(S)-hydroxy-eicosatrienoic acid      | 15(S)-HETrE   |
| 15-deoxy-Prostaglandin J2              | 15-deoxy-PGJ2 |
| 15-hydroxy-eicosapentaenoic acid       | 15-HEPE       |
| 15-hydroxy-eicosatetraenoic acid       | 15-HETE       |
| 15-oxo-eicosatetraenoic acid           | 15-oxo-ETE    |
| 16(17)-epoxy-docosapentaenoic acid     | 16(17)-EpDPE  |
| 16,17-dihydroxy-docosapentaenoic acid  | 16,17 DiHDPA  |
| 17- hydroxy-docosahexaenoic acid       | 17-HDoHE      |
| 17(18)-epoxy-eicosatetraenoic acid     | 17(18)-EpETE  |
| 17,18-dihydroxy-eicosatetraenoic acid  | 17,18-DiHETE  |
| 19(20)-epoxy-docosapentaenoic acid     | 19(20)-EpDPE  |
| 19,20-dihydroxy-docosapentaenoic acid  | 19,20-DiHDPA  |
| 20-COOH- Leukotriene B4                | 20-COOH-LTB4  |
| 20-hydroxy-eicosatetraenoic acid       | 20-HETE       |

|                                           |                   |
|-------------------------------------------|-------------------|
| 20-OH-Leukotriene B4                      | 20-OH-LTB4        |
| 5(6)-epoxy-eicosatrienoic acid            | 5(6)-EpETrE       |
| 5,15-dihydroxy-eicosatetraenoic acid      | 5,15-DiHETE       |
| 5,6-dihydroxy-eicosatetraenoic acid       | 5,6-DiHETE        |
| 5,6-dihydroxy-eicosatrienoic acid         | 5,6-DiHETrE       |
| 5-hydroxy-eicosapentaenoic acid           | 5-HEPE            |
| 5-hydroxy-eicosatetraenoic acid           | 5-HETE            |
| 5-oxo-eicosatetraenoic acid               | 5-oxo-ETE         |
| 6-keto-prostaglandin F1- $\alpha$         | 6-keto-PGF1a      |
| 6-trans-Leukotriene B4                    | 6-trans-LTB4      |
| 7(8)-epoxy-docosapentaenoic acid          | 7(8)-EpDPE        |
| 8(9)-epoxy-eicosatetraenoic acid          | 8(9)-EpETE        |
| 8(9)-epoxy-eicosatrienoic acid            | 8(9)-EpETrE       |
| 8,15-dihydroxy-eicosatetraenoic acid      | 8,15-DiHETE       |
| 8,9-dihydroxy-eicosatetraenoic acid       | 8,9-DiHETE        |
| 8,9-dihydroxy-eicosatrienoic acid         | 8,9-DiHETrE       |
| 8-hydroxy-eicosapentaenoic acid           | 8-HEPE            |
| 8-hydroxy-eicosatetraenoic acid           | 8-HETE            |
| 9(10)-epoxy-octadecamonoenoic acid        | 9(10)-EpOME       |
| 9,10,13-trihydroxy-octadecamonoenoic acid | 9,10,13-TriHOME   |
| 9,10-dihydroxy-octadecamonoenoic acid     | 9,10-DiHOME       |
| 9,12,13-trihydroxy-octadecamonoenoic acid | 9,12,13-TriHOME   |
| 9-hydroxy-eicosatetraenoic acid           | 9-HETE            |
| 9-hydroxy-octadecadienoic acid            | 9-HODE            |
| 9-hydroxy-octadecatrienoic acid           | 9-HOTrE           |
| 9-oxo-octadecadienoic acid                | 9-oxo-ODE         |
| d11-11(12)-epoxy-eicosatrienoic acid      | d-11-11(12)EpETrE |
| d11-14,15-dihydroxy-eicosatrienoic acid   | d11-14,15-DiHETrE |
| d4-6-keto-prostaglandin F1- $\alpha$      | d4-6-keto-PGF1a   |
| d4-9-hydroxy-octadecadienoic acid         | d4-9HODE          |
| d4-Leukotriene B4                         | d4-LTB4           |
| d4-Prostaglandin E2                       | d4-PGE2           |
| d-4-Thromboxane B2                        | d4-TXB2           |
| d6-20-hydroxy-eicosatetraenoic acid       | d6-20-HETE        |
| d8-5-hydroxy-eicosatetraenoic acid        | d8-5-HETE         |
| Leukotriene B3                            | LTB3              |
| Leukotriene B4                            | LTB4              |
| Leukotriene C4                            | LTC4              |
| Leukotriene D4                            | LTD4              |

|                               |             |
|-------------------------------|-------------|
| Leukotriene E4                | LTE4        |
| Lipoxin A4                    | LXA4        |
| Prostaglandin B2              | PGB2        |
| Prostaglandin D1+ E1 combined | PGD/E1      |
| Prostaglandin D2              | PGD2        |
| Prostaglandin D3              | PGD3        |
| Prostaglandin E2              | PGE2        |
| Prostaglandin E3              | PGE3        |
| Prostaglandin F2- $\alpha$    | PGF2a       |
| Prostaglandin J2              | PGJ2        |
| Resolvin E1                   | Resolvin E1 |
| Thromboxane B2                | TXB2        |

**Table S2.** Optimization parameters and parent and product ion monitoring pairs.

| Compound           | Prec Ion<br>(m/z) | Prod Ion<br>(m/z) | Frag<br>(V) | CE<br>(V) | Cell Acc<br>(V) | Ret Time<br>(min) | Internal Standard |
|--------------------|-------------------|-------------------|-------------|-----------|-----------------|-------------------|-------------------|
| Measured Oxylipins |                   |                   |             |           |                 |                   |                   |
| 20-COOH-LTB4       | 365.2             | 347.2             | 110         | 10        | 4               | 3.78              | d4-6-keto-PGF1a   |
| Resolvin E1        | 349.3             | 195               | 90          | 10        | 4               | 3.902             | d4-6-keto-PGF1a   |
| 6-keto-PGF1a       | 369.3             | 163.2             | 80          | 7         | 4               | 3.988             | d4-6-keto-PGF1a   |
| 20-OH-LTB4         | 351.2             | 195.2             | 130         | 12        | 4               | 4.08              | d4-6-keto-PGF1a   |
| PGE3               | 349.3             | 269.2             | 80          | 5         | 4               | 4.986             | d4-PGE2           |
| PGD3               | 349.3             | 269.2             | 80          | 5         | 4               | 5.25              | d4-PGE2           |
| TXB2               | 369.2             | 169.1             | 80          | 5         | 4               | 5.3               | d4-TXB2           |
| 9,12,13-TriHOME    | 329.2             | 211.1             | 120         | 8         | 4               | 5.479             | d4-PGE2           |
| 9,10,13-TriHOME    | 329.2             | 171.1             | 120         | 8         | 4               | 5.581             | d4-PGE2           |
| PGF2a              | 353.2             | 309.2             | 80          | 12        | 4               | 5.601             | d4-PGE2           |
| PGD/E1             | 353.3             | 317.2             | 80          | 5         | 4               | 5.8               | d4-PGE2           |
| PGE2               | 351.2             | 271.3             | 80          | 10        | 4               | 5.837             | d4-PGE2           |
| PGD2               | 351.2             | 271.3             | 80          | 10        | 4               | 6.1               | d4-PGE2           |
| LTD4               | 495.3             | 177.1             | 110         | 12        | 4               | 6.375             | d4-LTB4           |
| LXA4               | 351.2             | 115.2             | 90          | 10        | 4               | 6.691             | d4-LTB4           |
| LTE4               | 438.2             | 333.1             | 80          | 5         | 4               | 7.687             | d4-LTB4           |
| PGJ2               | 333.3             | 189.2             | 100         | 12        | 4               | 7.956             | d4-PGE2           |
| LTC4               | 624.3             | 272.1             | 110         | 12        | 4               | 8                 | d4-LTB4           |
| PGB2               | 333.3             | 175.1             | 80          | 10        | 4               | 8.042             | d4-PGE2           |
| LTB4               | 335.2             | 195.1             | 80          | 7         | 4               | 8.6               | d4-LTB4           |
| 8,15-DiHETE        | 335.2             | 235.2             | 50          | 7         | 4               | 8.606             | d11-14,15-DiHETrE |

|               |       |       |     |    |   |        |                   |
|---------------|-------|-------|-----|----|---|--------|-------------------|
| 6-trans-LTB4  | 335.2 | 195.1 | 80  | 7  | 4 | 8.865  | d4-LTB4           |
| 5,15-DiHETE   | 335.2 | 173.2 | 90  | 7  | 4 | 8.875  | d11-14,15-DiHETrE |
| 17,18-DiHETE  | 335.3 | 247.2 | 80  | 7  | 4 | 9      | d11-14,15-DiHETrE |
| 14,15-DiHETE  | 335.3 | 207.2 | 100 | 10 | 4 | 9.33   | d11-14,15-DiHETrE |
| 11,12-DiHETE  | 335.5 | 167   | 100 | 10 | 4 | 9.46   | d11-14,15-DiHETrE |
| 12,13-DiHOME  | 313.2 | 183.2 | 110 | 12 | 4 | 9.6    | d11-14,15-DiHETrE |
| 8,9-DiHETE    | 335.5 | 126.9 | 100 | 12 | 4 | 9.699  | d11-14,15-DiHETrE |
| 9,10-DiHOME   | 313.2 | 201.2 | 120 | 12 | 4 | 9.871  | d11-14,15-DiHETrE |
| 5,6-DiHETE    | 335.2 | 115.2 | 90  | 12 | 4 | 9.899  | d11-14,15-DiHETrE |
| 14,15-DiHETrE | 337.2 | 207.1 | 100 | 5  | 4 | 10.2   | d11-14,15-DiHETrE |
| 19,20-DiHDPa  | 361.5 | 273.1 | 100 | 8  | 4 | 10.2   | d11-14,15-DiHETrE |
| LTB3          | 337.2 | 195.2 | 110 | 7  | 4 | 10.31  | d4-LTB4           |
| 16,17 DiHDPa  | 361.5 | 233.1 | 100 | 8  | 4 | 10.5   | d11-14,15-DiHETrE |
| 11,12-DiHETrE | 337.2 | 167.1 | 120 | 12 | 4 | 10.62  | d11-14,15-DiHETrE |
| 9-HOTrE       | 293.2 | 171.2 | 120 | 10 | 4 | 10.765 | d4-9HODE          |
| 13-HOTrE      | 293.2 | 195.1 | 100 | 10 | 4 | 10.95  | d4-9HODE          |
| 8,9-DiHETrE   | 337.2 | 127.1 | 70  | 12 | 4 | 10.963 | d11-14,15-DiHETrE |
| 15-deoxy-PGJ2 | 315.2 | 271.2 | 120 | 5  | 4 | 11.2   | d4-PGE2           |
| 15-HEPE       | 317.2 | 219.2 | 110 | 5  | 4 | 11.28  | d6-20-HETE        |
| 20-HETE       | 319.2 | 275.1 | 110 | 7  | 4 | 11.3   | d6-20-HETE        |
| 5,6-DiHETrE   | 337.2 | 145.1 | 90  | 12 | 4 | 11.43  | d11-14,15-DiHETrE |
| 8-HEPE        | 317.2 | 155.2 | 100 | 7  | 4 | 11.448 | d6-20-HETE        |
| 12-HEPE       | 317.2 | 179.2 | 110 | 7  | 4 | 11.53  | d6-20-HETE        |
| 5-HEPE        | 317.2 | 115.1 | 80  | 5  | 4 | 11.78  | d6-20-HETE        |
| 13-HODE       | 295.2 | 195.2 | 100 | 7  | 4 | 11.89  | d4-9HODE          |
| 9-HODE        | 295.2 | 171.1 | 110 | 12 | 4 | 11.951 | d4-9HODE          |
| 15-HETE       | 319.2 | 219.2 | 120 | 5  | 4 | 12.171 | d8-5-HETE         |
| 17(18)-EpETE  | 317.2 | 215.2 | 90  | 10 | 4 | 12.27  | d-11-11(12)EpEtrE |
| 13-oxo-ODE    | 293.2 | 195.1 | 120 | 10 | 4 | 12.336 | d4-9HODE          |
| 11-HETE       | 319.2 | 167.2 | 100 | 10 | 4 | 12.4   | d8-5-HETE         |
| 9-HETE        | 319.2 | 167.2 | 100 | 10 | 4 | 12.414 | d8-5-HETE         |
| 15-oxo-ETE    | 317.2 | 113.1 | 110 | 7  | 6 | 12.5   | d8-5-HETE         |
| 14(15)-EpETE  | 317.2 | 207.2 | 90  | 5  | 4 | 12.575 | d-11-11(12)EpEtrE |
| 9-oxo-ODE     | 293.2 | 185.1 | 120 | 10 | 4 | 12.579 | d4-9HODE          |
| 12-HETE       | 319.2 | 179.2 | 100 | 10 | 4 | 12.62  | d8-5-HETE         |
| 8-HETE        | 319.2 | 155.2 | 90  | 5  | 4 | 12.624 | d8-5-HETE         |
| 11(12)-EpETE  | 317.2 | 167.2 | 100 | 10 | 4 | 12.65  | d-11-11(12)EpEtrE |
| 8(9)-EpETE    | 317.2 | 127.2 | 100 | 10 | 4 | 12.752 | d-11-11(12)EpEtrE |
| 15(S)-HETrE   | 321.2 | 221.2 | 80  | 10 | 4 | 12.8   | d8-5-HETE         |

|                    |       |       |     |    |   |        |                   |
|--------------------|-------|-------|-----|----|---|--------|-------------------|
| 12-oxo-ETE         | 317.2 | 153.1 | 70  | 7  | 4 | 12.885 | d8-5-HETE         |
| 5-HETE             | 319.2 | 115.1 | 80  | 5  | 4 | 12.96  | d8-5-HETE         |
| 17-HDoHE           | 343.2 | 281.2 | 50  | 7  | 4 | 13.22  | d4-9HODE          |
| 19(20)-EpDPE       | 343.2 | 241.2 | 120 | 5  | 4 | 13.23  | d-11-11(12)EpEtrE |
| 12(13)EpOME        | 295.3 | 195.2 | 100 | 7  | 4 | 13.373 | d-11-11(12)EpEtrE |
| 14(15)-EpETrE      | 319.2 | 219.3 | 120 | 5  | 4 | 13.4   | d-11-11(12)EpEtrE |
| 9(10)-EpOME        | 295.3 | 171.2 | 100 | 10 | 4 | 13.49  | d-11-11(12)EpEtrE |
| 16(17)-EpDPE       | 343.2 | 233.2 | 70  | 5  | 4 | 13.5   | d-11-11(12)EpEtrE |
| 13(14)-EpDPE       | 343.2 | 193.2 | 70  | 5  | 4 | 13.53  | d-11-11(12)EpEtrE |
| 10(11)-EpDPE       | 343.2 | 153.2 | 90  | 5  | 4 | 13.62  | d-11-11(12)EpEtrE |
| 5-oxo-ETE          | 317.2 | 273.2 | 120 | 5  | 4 | 13.648 | d8-5-HETE         |
| 8(9)-EpETrE        | 319.2 | 167.2 | 50  | 7  | 4 | 13.755 | d-11-11(12)EpEtrE |
| 11(12)-EpETrE      | 319.2 | 167.2 | 100 | 10 | 4 | 13.76  | d-11-11(12)EpEtrE |
| 7(8)-EpDPE         | 343.2 | 113.1 | 50  | 5  | 4 | 13.761 | d-11-11(12)EpEtrE |
| 5(6)-EpETrE        | 319.2 | 191.1 | 120 | 5  | 4 | 14.04  | d-11-11(12)EpEtrE |
| Internal Standards |       |       |     |    |   |        |                   |
| d4-6-keto-PGF1a    | 373.3 | 167.1 | 110 | 25 | 4 | 3.937  | NA                |
| d4-TXB2            | 373.3 | 173.2 | 100 | 12 | 4 | 5.5    | NA                |
| d4-PGE2            | 355.2 | 275.3 | 100 | 10 | 4 | 5.817  | NA                |
| d4-LTB4            | 339.2 | 197.2 | 80  | 10 | 4 | 9.129  | NA                |
| d11-14,15-DiHETrE  | 348.2 | 207.1 | 110 | 12 | 6 | 10.125 | NA                |
| d6-20-HETE         | 325.2 | 281.2 | 70  | 12 | 4 | 11.279 | NA                |
| d4-9HODE           | 299.2 | 172.3 | 80  | 10 | 4 | 11.9   | NA                |
| d8-5-HETE          | 327.2 | 116.1 | 70  | 7  | 4 | 12.881 | NA                |
| d-11-11(12)EpETrE  | 330.2 | 167.2 | 130 | 7  | 4 | 13.678 | NA                |

**Table S3.** Summary of the concentrations of each oxylipin analyzed in males and females.

| Oxylipin          | Male Control   | Male + sEHI              | Female Control  | Female + sEHI  |
|-------------------|----------------|--------------------------|-----------------|----------------|
| 6-keto-PGF1a      | 70.62 (23.34)  | 54.87 (9.95)             | 51.99 (18.77)   | 77.34 (32.14)  |
| TXB2              | 61.60 (12.35)  | 63.89 (4.05)             | 72.37 (20.59)   | 46.62 (10.41)* |
| PGD3              | 0.56 (0.30)    | 0.68 (0.11)              | 0.47 (0.13)     | 0.61 (0.32)    |
| 9,12,13-TriHOME   | 1.41 (0.46)    | 0.44 (0.38) <sup>#</sup> | 0.70 (0.64)     | 0.29 (2.80)    |
| 9,10,13-TriHOME   | 0.94 (0.15)    | 0.26 (0.45) <sup>#</sup> | 0.46 (0.24)     | 0.24 (0.99)    |
| PGF2a             | 74.05 (17.84)  | 94.73 (15.17)            | 86.94 (15.60)   | 56.80 (11.96)* |
| PGE2              | 47.61 (20.92)  | 47.93 (3.53)             | 46.97 (28.66)   | 34.15 (9.03)   |
| PGD/E1            | 1.90 (0.50)    | 2.17 (0.36)              | 1.62 (0.41)     | 1.59 (0.27)    |
| PGD2 <sup>1</sup> | 253.53 (85.03) | 355.64 (40.18)           | 266.07 (65.44)  | 263.86 (34.89) |
| LTD4              | 0.085 (0.18)   | 0.0014 (0.0000)          | 0.0014 (0.0000) | 0.0014 (2.84)  |

|               |                |                                |                |                           |
|---------------|----------------|--------------------------------|----------------|---------------------------|
| PGJ2          | 1.56 (0.73)    | 2.17 (0.55) <sup>#</sup>       | 2.24 (0.89)    | 1.64 (0.45)               |
| 8,15-DiHETE   | 58.71 (11.71)  | 17.97 (13.35) <sup>#</sup>     | 33.71 (32.39)  | 42.62 (70.32)             |
| 6-trans-LTB4  | 0.39 (0.46)    | 0.023 (0.049) <sup>*</sup>     | 0.0075 (0.27)  | 0.060 (0.57)              |
| 5,6-DiHETE    | 8.91 (4.87)    | 4.48 (1.48)                    | 6.65 (4.99)    | 4.44 (3.49)               |
| 5,15-DiHETE   | 2.31 (0.49)    | 1.45 (0.36) <sup>*</sup>       | 2.39 (1.14)    | 2.15 (4.45)               |
| 17,18-DiHETE  | 4.56 (2.76)    | 1.93 (1.46)                    | 3.90 (3.72)    | 3.59 (32.30)              |
| LTB4          | 0.59 (0.25)    | 0.16 (0.22) <sup>*</sup>       | 0.26 (0.045)   | 0.21 (0.31)               |
| 12,13-DiHOME  | 0.76 (0.56)    | 0.025 (0.13) <sup>#</sup>      | 0.25 (0.33)    | 0.084 (2.06)              |
| 9,10-DiHOME   | 0.38 (0.14)    | 0.0061 (0.0000) <sup>#</sup>   | 0.0061 (0.037) | 0.0061 (1.35)             |
| 19,20-DiHDPA  | 0.91 (0.31)    | 1.14 (0.47)                    | 1.28 (0.42)    | 1.33 (2.12)               |
| 14,15-DiHETrE | 1.13 (0.16)    | 0.77 (0.30) <sup>*</sup>       | 1.28 (0.67)    | 0.62 (0.38)               |
| 16,17-DiHDPA  | 0.19 (0.10)    | 0.11 (0.053)                   | 0.20 (0.11)    | 0.18 (0.49)               |
| 11,12-DiHETrE | 0.43 (0.17)    | 0.23 (0.093)                   | 0.34 (0.26)    | 0.22 (1.12)               |
| 9-HOTrE       | 1.70 (0.40)    | 0.0066 (0.0000) <sup>#</sup>   | 0.0066 (0.26)  | 0.0066 (11.99)            |
| 13-HOTrE      | 1.45 (0.27)    | 0.49 (0.11)                    | 0.73 (0.81)    | 1.06 (9.53)               |
| 15-deoxy-PGJ2 | 0.57 (0.23)    | 0.69 (0.31)                    | 0.74 (0.51)    | 0.60 (5.52)               |
| 5,6-DiHETrE   | 0.079 (0.086)  | 0.0043 (0.0000) <sup>*</sup>   | 0.0043 (0.049) | 0.13 (0.29)               |
| 12-HEPE       | 0.61 (0.45)    | 0.37 (0.30)                    | 0.40 (0.17)    | 0.20 (0.21)               |
| 5-HEPE        | 0.17 (0.24)    | 0.029 (0.074)                  | 0.059 (0.56)   | 0.076 (0.30)              |
| 13-HODE       | 7.37 (1.99)    | 4.20 (2.06) <sup>#</sup>       | 5.17 (1.90)    | 4.97 (32.96)              |
| 9-HODE        | 4.78 (0.27)    | 2.13 (0.20) <sup>*</sup>       | 3.10 (1.72)    | 3.03 (10.94)              |
| 15-HETE       | 104.50 (8.10)  | 244.39 (41.76) <sup>#</sup>    | 260.90 (35.82) | 283.16 (112.06)           |
| 9-HETE        | 91.16 (10.25)  | 181.73 (43.42) <sup>#</sup>    | 198.92 (75.76) | 145.53 (40.86)            |
| 11-HETE       | 91.28 (10.37)  | 181.76 (43.33) <sup>#</sup>    | 198.87 (76.01) | 141.96 (40.56)            |
| 15-oxo-ETE    | 5.98 (3.15)    | 7.74 (3.01)                    | 7.12 (3.96)    | 6.70 (54.80)              |
| 9-oxo-ODE     | 0.98 (0.21)    | 0.00069 (0.00000) <sup>#</sup> | 0.0035 (0.16)  | 0.18 (6.41)               |
| 8-HETE        | 10.35 (3.73)   | 13.96 (1.75)                   | 11.33 (2.05)   | 18.54 (12.72)             |
| 12-HETE       | 100.50 (60.29) | 109.33 (55.14)                 | 52.05 (26.65)  | 82.75 (26.49)             |
| 15(S)-HETrE   | 2.81 (0.80)    | 1.99 (0.97)                    | 1.29 (0.79)    | 3.02 (5.69)               |
| 12-oxo-ETE    | 1.17 (0.37)    | 0.87 (0.47)                    | 0.99 (0.52)    | 2.38 (11.77) <sup>*</sup> |
| 5-HETE        | 14.46 (1.50)   | 7.05 (1.94) <sup>#</sup>       | 12.52 (3.05)   | 12.69 (31.60)             |
| 19(20)-EpDPE  | 4.86 (1.83)    | 3.84 (0.75)                    | 6.22 (4.13)    | 5.96 (205.81)             |
| 12(13)-EpOME  | 0.47 (2.84)    | 0.048 (0.14)                   | 2.64 (2.75)    | 0.048 (10.92)             |
| 14(15)-EpETrE | 23.05 (6.69)   | 19.78 (4.99)                   | 25.64 (7.72)   | 21.57 (147.11)            |
| 16(17)-EpDPE  | 2.60 (1.55)    | 2.97 (0.55)                    | 1.97 (2.21)    | 3.30 (162.40)             |
| 9(10)-EpOME   | 0.11 (0.16)    | 0.033 (0.0000)                 | 0.16 (1.15)    | 0.033 (2.45)              |
| 13(14)-EpDPE  | 2.48 (0.87)    | 3.16 (1.45)                    | 3.36 (1.18)    | 3.97 (107.54)             |
| 10(11)-EpDPE  | 1.23 (1.49)    | 2.90 (1.47)                    | 2.91 (1.76)    | 2.76 (2.96)               |
| 5-oxo-ETE     | 4.11 (2.87)    | 2.81 (2.05)                    | 4.12 (2.05)    | 10.79 (8.80)              |

|               |               |              |               |                |
|---------------|---------------|--------------|---------------|----------------|
| 7(8)-EpDPE    | 2.68 (4.34)   | 2.37 (2.31)  | 2.70 (1.75)   | 2.99 (108.05)  |
| 11(12)-EpETrE | 19.13 (8.21)  | 17.28 (4.19) | 21.53 (7.59)  | 17.84 (160.69) |
| 8(9)-EpETrE   | 21.37 (8.37)  | 19.93 (3.26) | 23.66 (7.61)  | 19.84 (160.25) |
| 5(6)-EpETrE   | 21.13 (11.17) | 22.96 (8.70) | 24.10 (10.13) | 21.24 (169.77) |

Median (interquartile range) all units: pmol/g tissue.

\* p<0.05 compared to control mice of the same sex; # FDR adjusted p<0.05 compared to control mice of the same sex; <sup>1</sup>PGD2 signal was above the standard curve for many samples.

## 15-HETE

### Blank

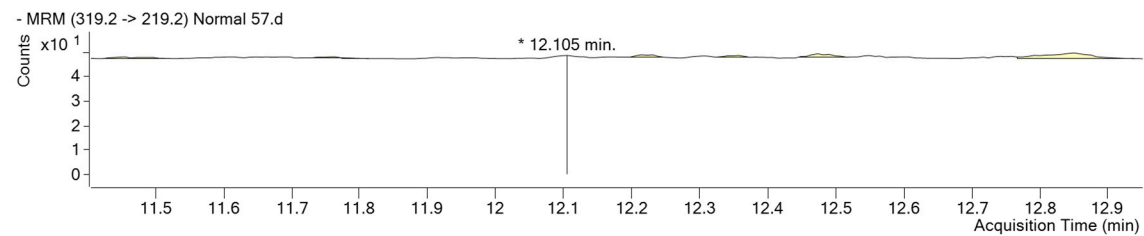

### Standard

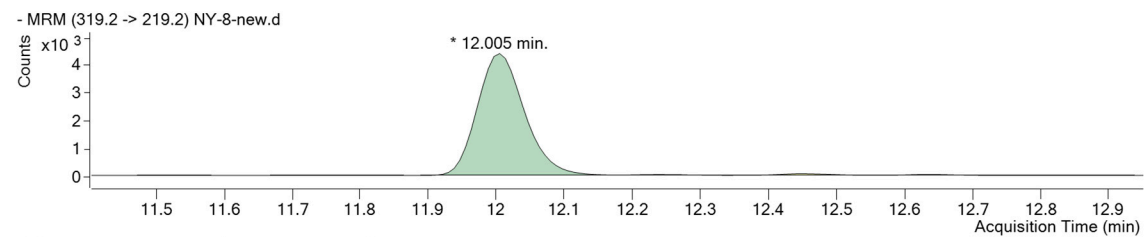

### Representative sample

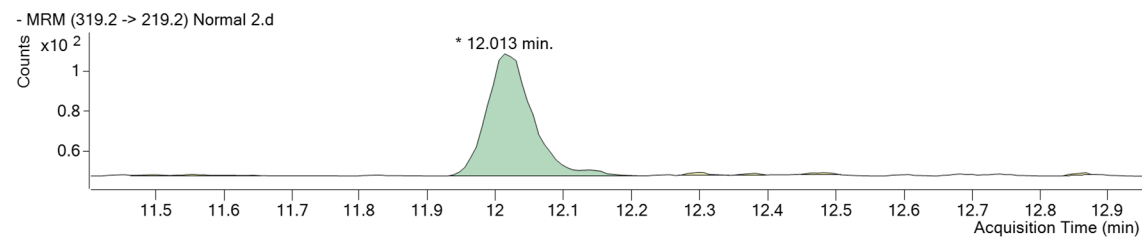

**Figure S1.** Raw mass spectra for 15-HETE. Raw mass spectra are provided for blank, standard, and a representative sample for 15-HETE.



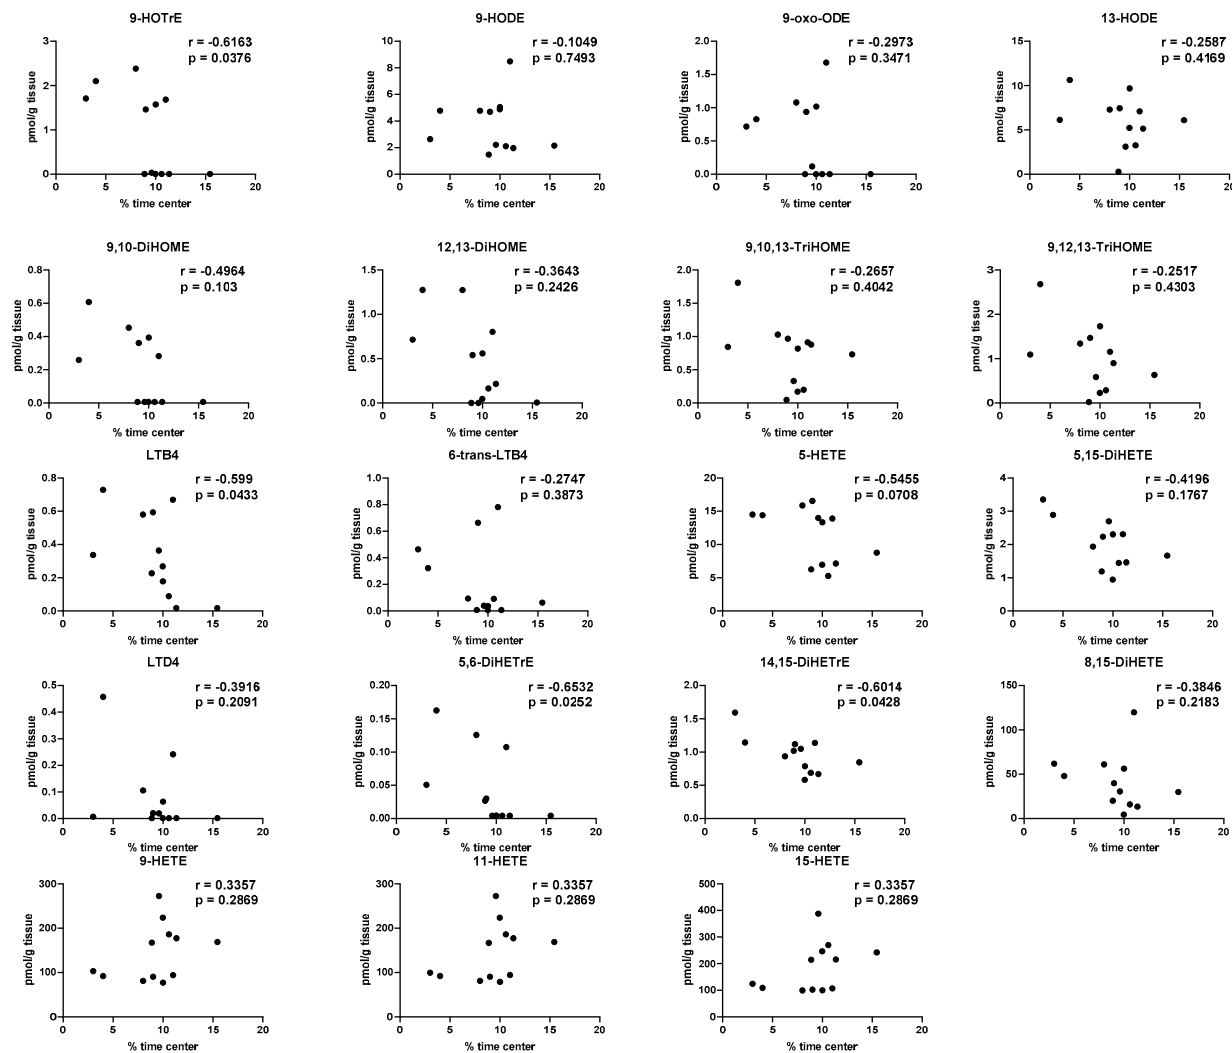

**Figure S2.** Spearman correlation of open field percent time in center with significant oxylipins in males. Scatter plots of male data of open field percent time in center and oxylipin concentrations for all oxylipins significantly changed by sEH in males. The Spearman  $r$  and two-tailed  $p$  value are indicated on each scatter plot.

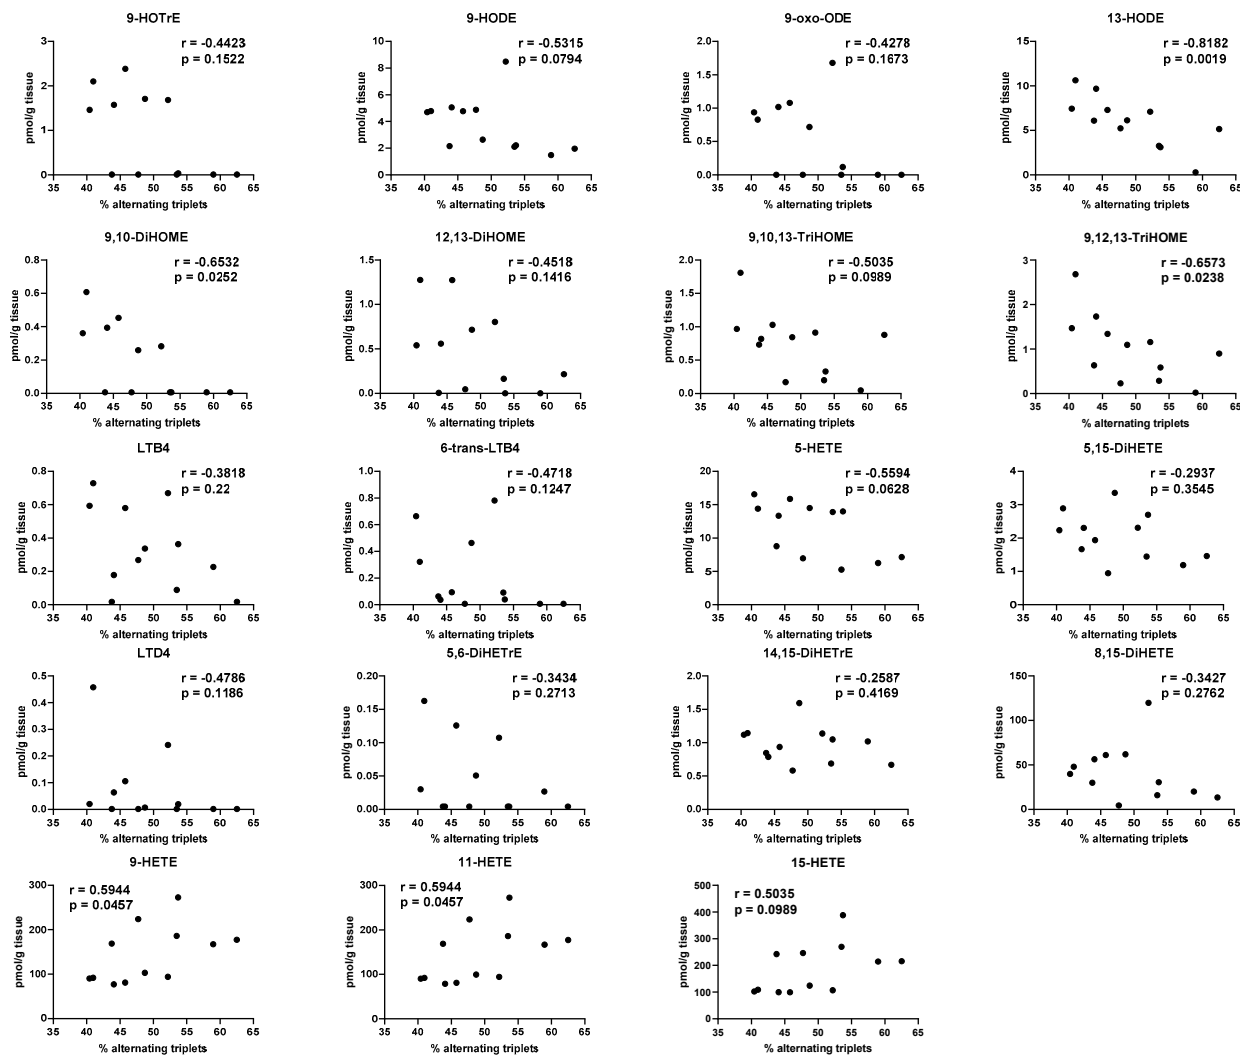

**Figure S3.** Spearman correlation of Y-maze percent alternating triplets with significant oxylipins in males. Scatter plots of male data of Y-maze percent alternating triplets and oxylipin concentrations for all oxylipins significantly changed by sEH1 in males. The Spearman  $r$  and two-tailed  $p$  value are indicated on each scatter plot.
